# Supplementary material for: Imputation of missing IPCC AR6 data on land carbon sequestration
Source: Copernicus journal article supplement (doi:10.5194/essd-2024-68), 2024-03-14

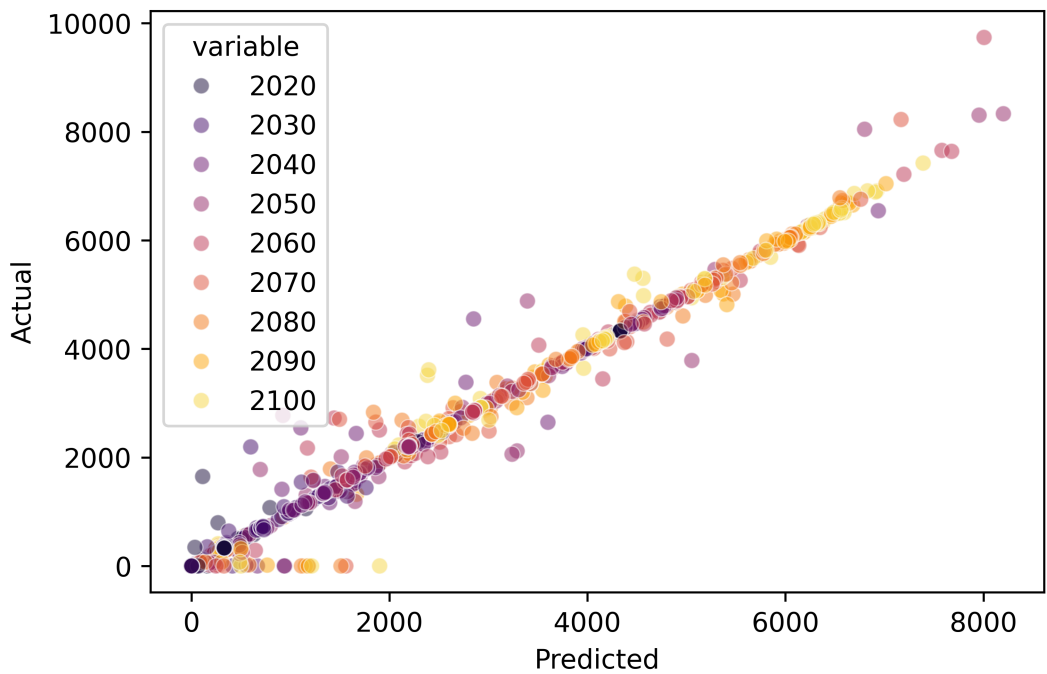

Supplement: Supplementary file [file essd-2024-68-AC4-supplement.pdf]
